# Supplementary material for: Synthesis and liquid crystalline properties of biphenyl esters of monothio- and dithiotrimellitimides
Source: Royal Society of Chemistry journal article supplement (doi:10.1039/b000686f), 2000-01-01
Supplement: b000686f.doc [file b000686f.doc]

## DEPOSIT

Synthesis and liquid crystalline properties of biphenyl esters of monothio- and dithiotrimellitimides

**Ewa Białecka-Florjańczyk and Andrzej Orzeszko***

*Agricultural University, Institute of Chemistry, 26/30 Rakowiecka St., 02-528 Warsaw, Poland*

## Experimental

**Instrumentation**

All product structures were confirmed by FTIR, 1H NMR, and 13C NMR spectroscopy in some cases. The infrared spectra [in CH2Cl2] were recorded on a Perkin-Elmer 2000 apparatus equipped with the Pegrams 2000 software, and the NMR spectra [in CDCl3] were taken using a Varian Gemini 200 MHz spectrometer. UV spectra [in CHCl3] were acquired with a Perkin-Elmer 11 apparatus. DSC studies were performed at a rate of 10C min-1 using a Perkin-Elmer 7 calorimeter. The textures of the mesophases were studied using a polarising, hot-stage-equipped microscope Biolar PI.

**Synthesis**

All chemicals used were analytical grade commercial products [Aldrich] and were used with no further purification. 4-Decyloxy-4’-hydroxybiphenyl (**1c**) was obtained as described previously;7 yield: 25%; mp. 151C. 5-Carboxy-2-hexyl-(1,3-dihydro-2*H*-isoindole)-1,3-dione (N-hexyl-trimellitimide, **2**) was synthesised according to the method described erlier,13; yield: 70%; m.p. 142C.

#### Synthesis of 3a-c

To 1 mmol of N-hexyltrimellitimide (**2**) (275mg) dissolved in 25cm3 of dry CH2Cl2, 1 mmol of **1a-c**, 1.1 mmol (230mg) of dicyclohexylcarbodiimide (DCC) and a catalytic amount of dimethylaminopyridine (DMAP) were added. The reaction mixtures were stirred for 6 h, the side product N,N-dicyclohexylurea was filtered off and the crude products of interest were crystallised from hexane-benzene (3:2) mixture after removing methylene chloride. The yield was approximately 65% for all compounds. Phase transition temperatures are given in Table 2. The purity of the products was verified by silica gel TLC using hexane-benzene (3:2) mixture as an eluent.

For **3a**: [5-(4-biphenyloxycarbonyl)-2-hexyl-(1,3-dihydro-2*H*-isoindole)]-1,3-dione:

FTIR (cm‑1) 1775 C=Oimide, 1742 C=Oester, 1716 C=Oimide;

1H NMR (ppm) 0.89 (t, 3H), 1.27-1.39 (m, 6H), 1.63-1.73 (m, 2H), 3.71 (t, 2H), 7.28-7.65 (m, 9H), 7.95 (dd, 1H, J7,6=7.8 Hz, J7,4 = 0.6 Hz), 8.53 (dd, 1H, J6,7=7.8 Hz, J6,4 =1.4Hz), 8.62 (dd, 1H, J4,6=1.4 Hz, J4,7 = 0.6 Hz);

13C NMR (ppm) 13.8, 22.3, 26.4, 28.3, 31.157, 38.2, 121.5, 123.2, 124.5, 126.9, 127.3, 128.1, 128.7, 132.4, 134.7, 135.6, 135.8, 139.2, 139.9, 149.8, 163.1, 167.0, 167.1;

UV-VIS nm () 249 (42000), 301 (53000);

Yield = 70%, Rf = 0.08.

For **3b**: {5-[4-(4’cyanobiphenyl)-oxycarbonyl]-2-hexyl-(1,3-dihydro-2*H*-isoindole)}-1,3-dione:

FTIR (cm-1) 2230 CN, 1776 C=Oimide, 1745 C=Oester, 1718 C=Oimide ;

1H NMR (ppm) 0.87 (t, 3H), 1.26-1.33 (m, 6H), 1.67-1.74 (m, 2H), 3.73 (t, 2H), 7.34-7.78 (m, 8H), 8.00 (dd, 1H, J7,6=7.8 Hz, J7,4=0.6 Hz), 8.57 (dd, 1H, J6,7=7.8 Hz, J6,4=1.4Hz), 8.65 (dd, 1H, J4,6=1.4 Hz, J4,7=0.6 Hz);

UV-VIS nm () 249 (31000), 270 (35000);

Yield = 68%, Rf = 0.07.

For **3c**: {5-[4-(4’-decyloxybiphenyl)-oxycarbonyl]-2-hexyl-(1,3-dihydro-2*H*-isoindole)}-1,3-dione:

FTIR (cm-1) 1772 C=Oimide, 1743 C=Oester, 1719 C=Oimide ;

1H NMR (ppm) 0.86-0.91 (m, 6H), 1.28-1.43 ( m, 20H), 1.67-1.88 (m, 4H), 3.73 (t, 2H, N-CH2), 4.00 (t, 2H, O-CH2­-), 6.96-7.64 (m, 8H), 7.99 (dd, 1H, J7,6=7.8 Hz, J7,4=0.6 Hz), 8.58 (dd, 1H, J6,7=7.8 Hz, J6,4=1.4 Hz), 8.67 (dd, 1H, J4,6=1.4 Hz, J4,7=0.6 Hz);

UV-VIS nm () 249 (31400), 265 (28500);

Yield 70%, Rf = 0.09.

**Synthesis of 4a-c, 5a-c and 6a-c**

1 mmol of **3a-c** in 10 cm3 of toluene and 1 mmol of Lawesson’s reagent were refluxed for 1 h. The solvent was next evaporated to dryness and the crude products were purified and separated (each product mixture contained three thioimide derivatives) by column chromatography (SiO2) using hexane-benzene (1:1) as an eluent.

For **4a**: [5-(4-biphenyloxycarbonyl)-2-hexyl-(1,3-dihydro-2*H*-isoindole)]-3-thioxo-1-one:

FTIR (cm-1) 1743 C=Oester, 1742 C=Oimide ,1344 C=S;

1H NMR (ppm) 0.90 (t, 3H), 1.28-1.45 (m, 6H), 1.68-1.81 (m, 2H), 4.08 (t, 2H), 7.30-7.67 (m, 9H), 7.92 (dd, 1H, J7,6=7.8 Hz, J7,4= 0.6 Hz), 8.55 (dd, 1H, J6,7=7.8 Hz, J6,4=1.4 Hz), 8.76 (dd, 1H, J4,6=1.4 Hz, J4,7=0.6 Hz);

13C NMR (ppm) 13.9, 22.4, 26.5, 27.8, 31.3, 41.3, 121.7, 122.9, 125.2, 127.1, 127.4, 128.2, 128.8, 131.1, 134.7, 134.8, 137.1, 139.4, 140.1, 149.9, 163.5, 168.9, 195.4;

UV-VIS nm () 295 (sh,54000), 336 (43800), 506 (30);

Yield 10%, Rf = 0.17; elemental analysis calculated for formula C27H25NO3S:

C 73.11, H 5.68, N 3.16, S 7.23; found: C 73.31, H 5.61, N 3.86, S 7.00.

For **5a**: [5-(4-biphenyloxycarbonyl)-2-hexyl-(1,3-dihydro-2*H*-isoindole)]-1-thioxo-3-one:

FTIR (cm-1) 1747 C=Oimide, 1742 C=Oester, 1344 C=S;

1H NMR (ppm) 0.91 (t, 3H), 1.28-1.43 (m, 6H), 1.68-1.80 (m, 2H), 4.08 (t, 2H), 7.31-7.68 (m, 9H), 8.07 (dd, 1H, J7,6=7.8 Hz, J7,4=0.6 Hz), 8.53 (dd, 1H, J6,7=7.8 Hz, J6,4=1.4 Hz), 8.61 (dd, 1H, J4,6=1.4 Hz, J4,7=0.6 Hz);

13C NMR (ppm) 13.9, 22.5, 26.5, 27.8, 31.3, 41.4, 121.6, 123.8, 124.5, 127.0, 127.4, 127.6, 128.2, 128.8, 133.8, 135.7, 139.4, 140.1, 149.9, 163.5, 168.7, 195.2;

UV-VIS nm () 295 (71000), 305 (72300), 330 (51200), 511 (34);

Yield 15%, Rf = 0.29; elemental analysis calculated for formula C27H25NO3S:

C 73.11, H 5.68, N 3.16, S 7.23; found: C 73.45, H 5.41, N 3.46, S 7.20.

For **6a**: [5-(4-biphenyloxycarbonyl)-2-hexyl-(1,3-dihydro-2*H*-isoindole)]-1,3-dithione:

FTIR (cm-1) 1741 C=Oester , 1361 C=S;

1H NMR (ppm) 0.92 (t, 3H), 1.29-1.45 (m, 6H), 1.69-1.80 (m, 2H), 4.57 (t,2 H), 7.31-7.64 (m, 9H), 7.96 (dd, 1H, J7,6=7.8 Hz, J7,4=0.6 Hz), 8.50 (dd, 1H, J6,7=7.8 Hz, J6,4=1.4 Hz), 8.66 (dd, 1H, J4,6=1.4 Hz, J4,7=0.6 Hz);

13C NMR (ppm) 14.0, 22.5, 26.5, 27.6, 31.3, 44.3, 121.7, 123.3, 125.0, 127.1, 127.4, 128.2, 128.8, 133.6, 134.4, 134.8, 137.6, 139.3, 140.1, 150.0, 163.7, 195.6, 195.7;

UV-VIS nm () 354 (60500), 400 (58700), 509 (108), 540 (sh, 92);

Yield 30%, Rf = 0.58; elemental analysis calculated for formula C27H25NO2S2:

C 70.56, H 5.48, N 3.05, S 13.95; found: C 70.36, H 5.68, N 3.86, S 13.41.

For **4b {**5-[4-(4’-cyanobiphenyl)-oxycarbonyl]-2-hexyl-(1,3-dihydro-2*H*-isoindole)}-3-thioxo-1-one:

FTIR (cm-1) 2230 CN, 1741 C=Oimide,ester, 1345 C=S;

1H NMR (ppm) 0.89 (t, 3H), 1.28-1.44 (m, 6H), 1.67-1.78 (m, 2H), 4.09 (t,2 H), 7.31-7.78 (m, 8H), 7.94 (dd, 1H, J7,6=7.8 Hz, J7,4=0.6 Hz), 8.56 (dd, 1H, J6,7=7.8 Hz, J6,4=1.4 Hz), 8.76 (dd, 1H, J4,6=1.4 Hz, J4,7=0.6 Hz);

UV-VIS nm () 278 (76000), 335 (26300), 506 (27);

Yield 12%, Rf = 0.31; elemental analysis calculated for formula C28H24N2O3S:

C 71.77, H 5.16, N 5.98, S 6.84; found: C 72.31, H 5.52, N 5.80, S 7.02.

For **5b**: {5-[4-(4’-cyanobiphenyl)-oxycarbonyl]-2-hexyl-(1,3-dihydro-2*H*-isoindole)}-1-thioxo-3-one:

FTIR (cm-1) 2230 CN, 1746 C=Oimide, 1741 C=Oester , 1345 C=S;

1H NMR (ppm) 0.89 (t, 3H), 1.23-1.41 (m, 6H), 1.67-1.78 (m, 2H), 4.08 (t,2 H), 7.34-7.78 (m, 8H), 8.10 (dd, 1H, J7,6=7.8 Hz, J7,4=0.6 Hz), 8.54 (dd, 1H, J6,7=7.8 Hz, J6,4=1.4 Hz), 8.62 (dd, 1H, J4,6=1.4 Hz, J4,7=0.6 Hz);

UV-VIS nm () 272 (82000), 285 (78000), 332 (73100), 512 (32);

Yield 25%, Rf = 0.21; elemental analysis calculated for formula C28H24N2O3S:

C 71.77, H 5.16, N 5.98, S 6.84; found: C 72.43, H 5.24, N 5.78, S 6.97.

For **6b**: {5-[4-(4’cyanobiphenyl)-oxycarbonyl]-2-hexyl-(1,3-dihydro-2*H*-isoindole)}-1,3-dithione:

FTIR (cm-1) 1740 C=Oester, 1344 C=S;

1H NMR (ppm) 0.89 (t, 3H), 1.30-1.44 (m, 6H), 1.68-1.83 (m, 2H), 4.46 (t,2 H), 7.34-7.78 (m, 8H), 7.99 (dd, 1H, J7,6=7.8 Hz, J7,4 = 0.6 Hz), 8.51 (dd, 1H, J6,7=7.8 Hz, J6,4=1.4 Hz), 8.67 (dd, 1H, J4,6=1.4 Hz, J4,7 = 0.6 Hz);

UV-VIS nm () 269 (72000), 352 (65600), 400 (67000), 509 (129), 540 (sh, 107);

Yield 35%, Rf = 0.31; elemental analysis calculated for formula C28H24N2O2S2:

C 69.39, H 4.99, N 5.78, S 13.23; found: C 70.01, H 5.32, N 5.90, S 14.00.

For **4c**: {5-[4-(4’-decyloxybiphenyl)-oxycarbonyl]-2-hexyl-(1,3-dihydro-2*H*-isoindole)}-3-thioxo-1-one:

FTIR (cm-1) 2230 CN, 1743 C=Oimide,ester, 1361 C=S;

1H NMR (ppm) 0.86-0.92 (m, 6H), 1.28-1.46 (m, 20H), 1.68-1.89 (m, 4H), 4.0 (t, 2H O-CH2-), 4.08 (t, 2H NH2-) 6.96-7.64 (m, 8H), 7.92 (dd, 1H, J7,6=7.8 Hz, J7,4 = 0.6 Hz), 8.55 (dd, 1H, J6,7=7.8 Hz, J6,4 = 1.4 Hz), 8.76 (dd, 1H, J4,6=1.4 Hz, J4,7 = 0.6 Hz);

UV-VIS nm () 266 (82000), 336 (32300), 509 (30);

Yield 8%, Rf = 0.13; elemental analysis calculated for formula C37H45NO3S:

C 76.12, H 7.77, N 2.40, S 5.49; found: C 76.30, H 7.55, N 2.76, S 5.72.

For **5c**: {5-[4-(4’-decyloxybiphenyl)-oxycarbonyl]-2-hexyl-(1,3-dihydro-2*H*-isoindole)}-1-thioxo-3-one:

FTIR (cm-1) 1742 C=Oimide,ester ,1344 C=S;

1H NMR (ppm) ) 0.85-0.92 (m, 6H), 1.28-1.52 (m, 20H), 1.67-1.88 (m, 4H), 4.00 (t, 2H O-CH2-), 4.08 (t, 2H NH2-) 6.96-7.64 (m, 8H), 8.09 (dd, 1H, J7,6=7.8 Hz, J7,4 = 0.6 Hz), 8.54 (dd, 1H, J6,7=7.8 Hz, J6,4 = 1.4 Hz), 8.62 (dd, 1H, J4,6=1.4 Hz, J4,7 = 0.6 Hz);

UV-VIS nm () 278 (85000), 330 (58000), 355 (sh, 45000), 509 (35);

Yield 13%, Rf = 0.26; elemental analysis calculated for formula C37H45NO3S:

C 76.12, H 7.77, N 2.40, S 5.49; found: C 76.20, H 7.59, N 2.76, S 5.80.

For **6c**: {5-[4-(4’-decyloxybiphenyl)-oxycarbonyl]-2-hexyl-(1,3-dihydro-2*H*-isoindole)}-1,3-dithione:

FTIR (cm-1) 1740 C=Oester, 1361 C=S;

1H NMR (ppm) ) 0.86-0.92 (t, 6H), 1.28-1.52 (m, 20H), 1.68-1.88 (m, 4H), 4.0 (t, 2H,O-CH2), 4.46 (t, 2H NH2-) 6.96-7.64 (m, 8H), 7.98 (dd, 1H, J7,6=7.8 Hz, J7,4 = 0.6 Hz), 8.51 (dd, 1H, J6,7=7.8 Hz, J6,4 = 1.4 Hz), 8.67 (dd, 1H, J4,6=1.4 Hz, J4,7 = 0.6 Hz);

UV-VIS nm () 266 (87200), 353 (76400), 400 (74700), 507 (135), 540 (sh, 115);

Yield 25%, Rf = 0.54; elemental analysis calculated for formula C37H45NO2S2:

C 74.08, H 7.56, N 2.33, S 10.69; found: C 74.33, H 7.57, N 2.66, S 10.92.
